# Supplementary figures and images for: Study of the multilayer assembly and complex formation of poly(diallyldimethylammonium chloride) (PDADMAC) and poly(acrylic acid) (PAA) as a function of pH
Source: Royal Society of Chemistry journal article supplement (doi:10.1039/c2sm26884a), 2012-12-19

### Supplementary information

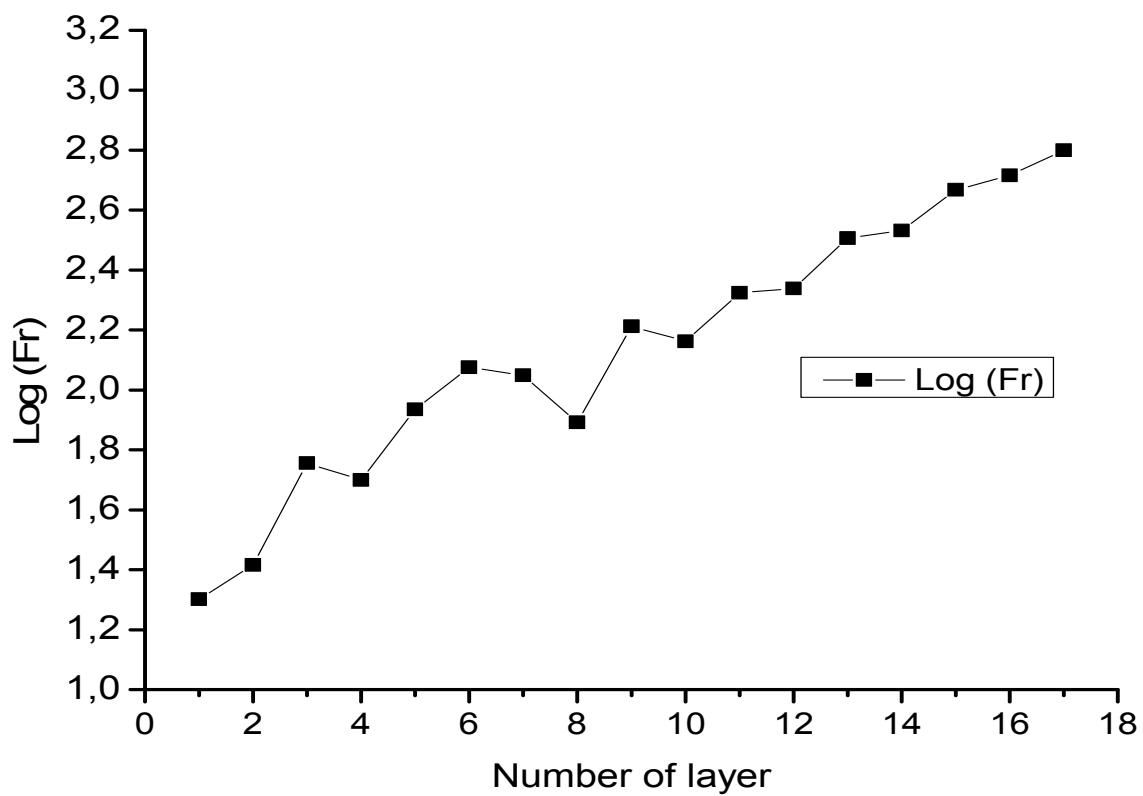

Fig S1 Logarithm of the QCM-D frequency for 17 layers PDADMAC/PAA a pH 3

Supplement: c2sm26884a.pdf [file c2sm26884a.pdf]
